# Supplementary material for: Normal DNA Methylation Dynamics in DICER1-Deficient Mouse Embryonic Stem Cells
Source: PubMed Central journal article supplement (PMC3435250; doi:10.1371/journal.pgen.1002919), 2012-09-06

**Figure S1-A**

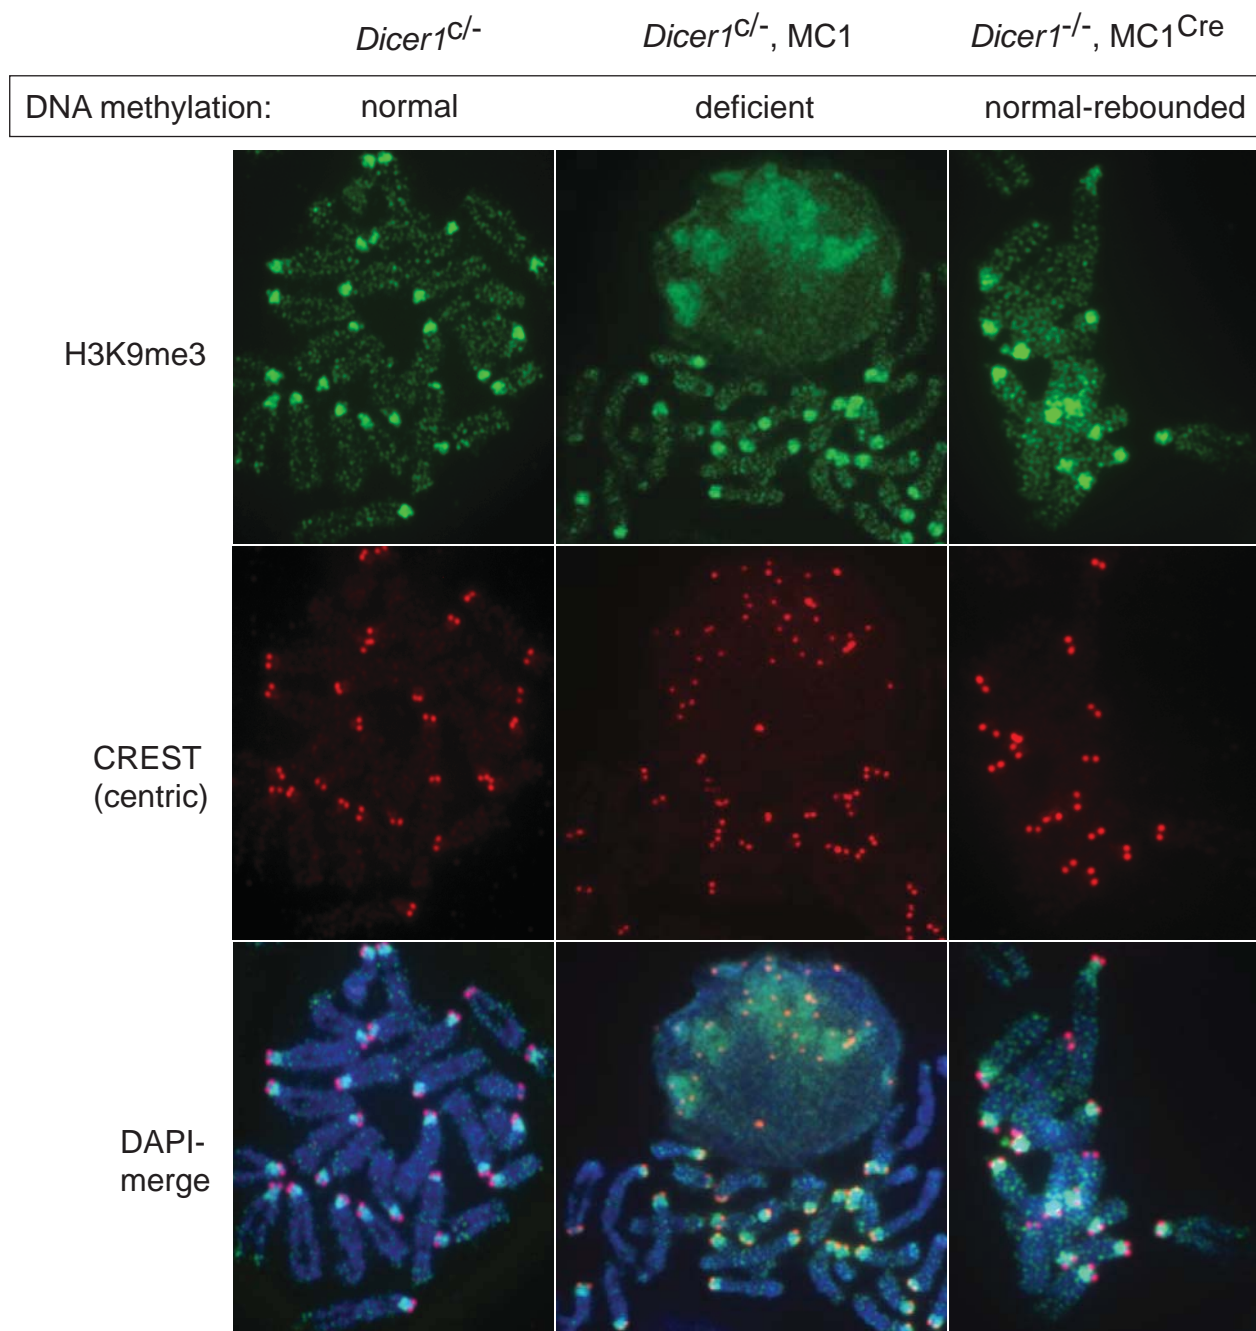

Figure S1-B

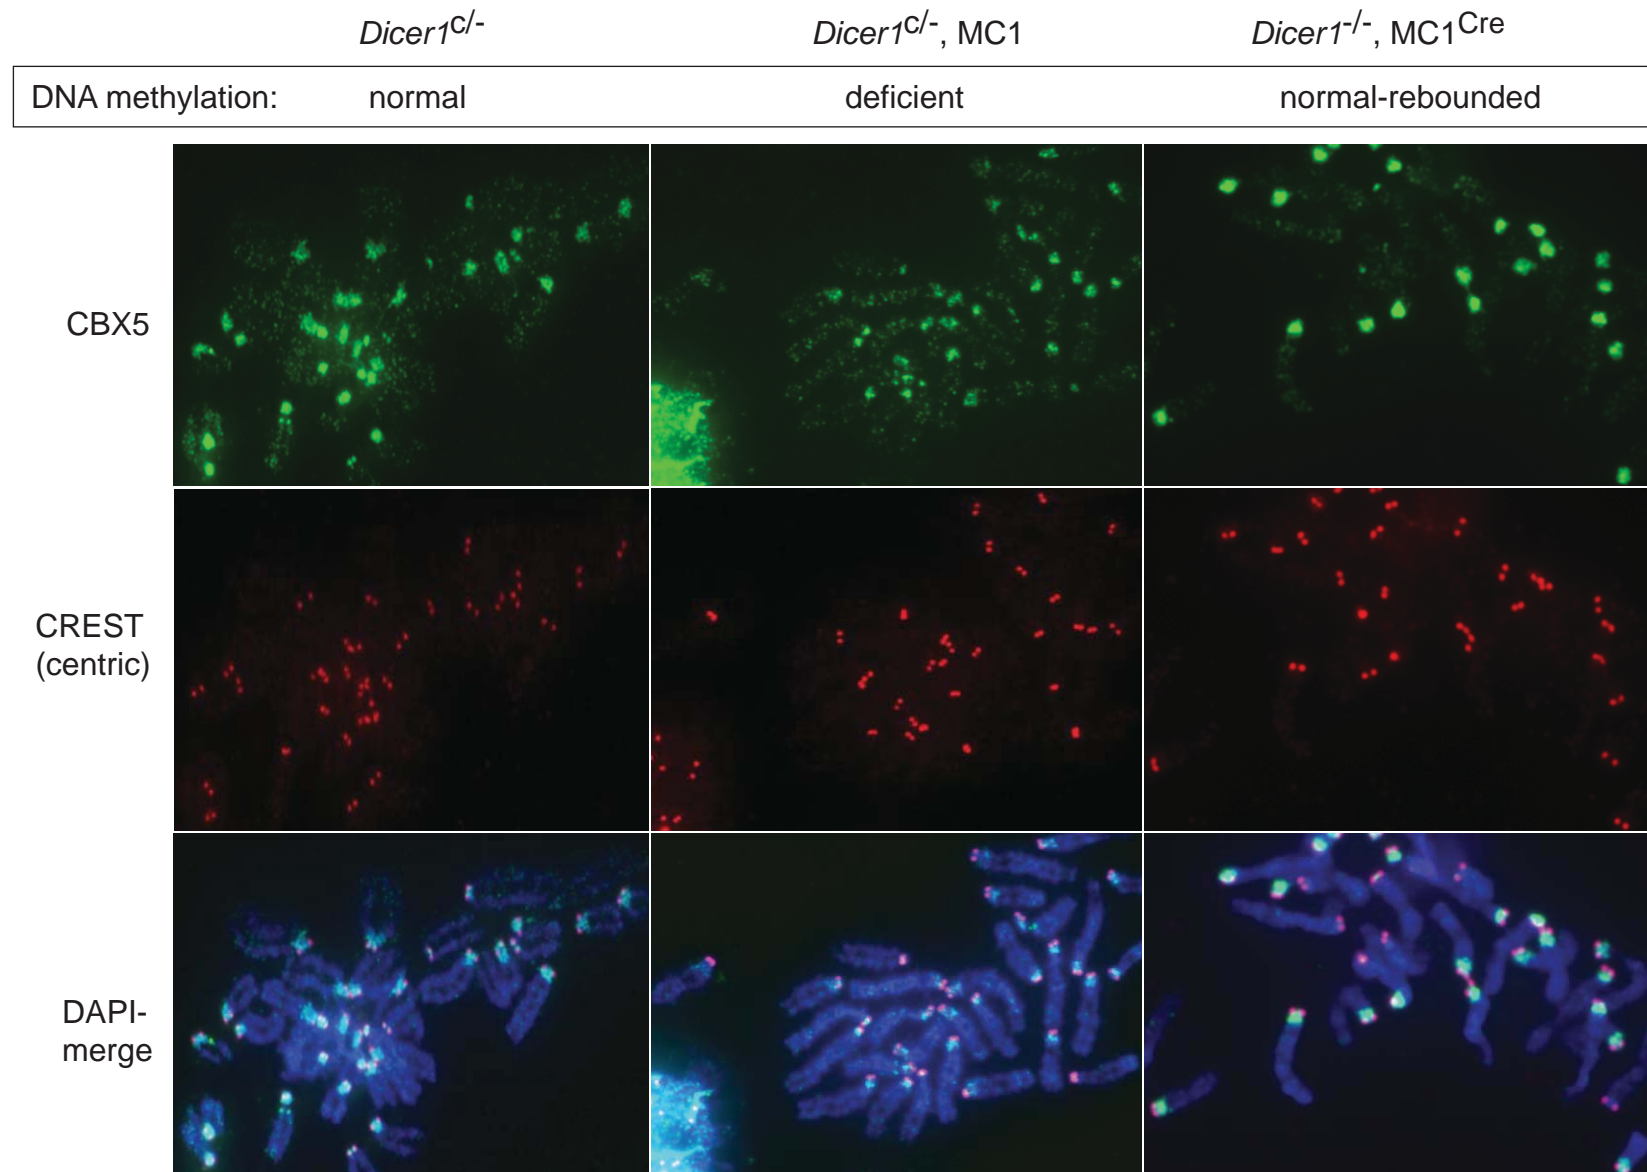

Figure S1-C

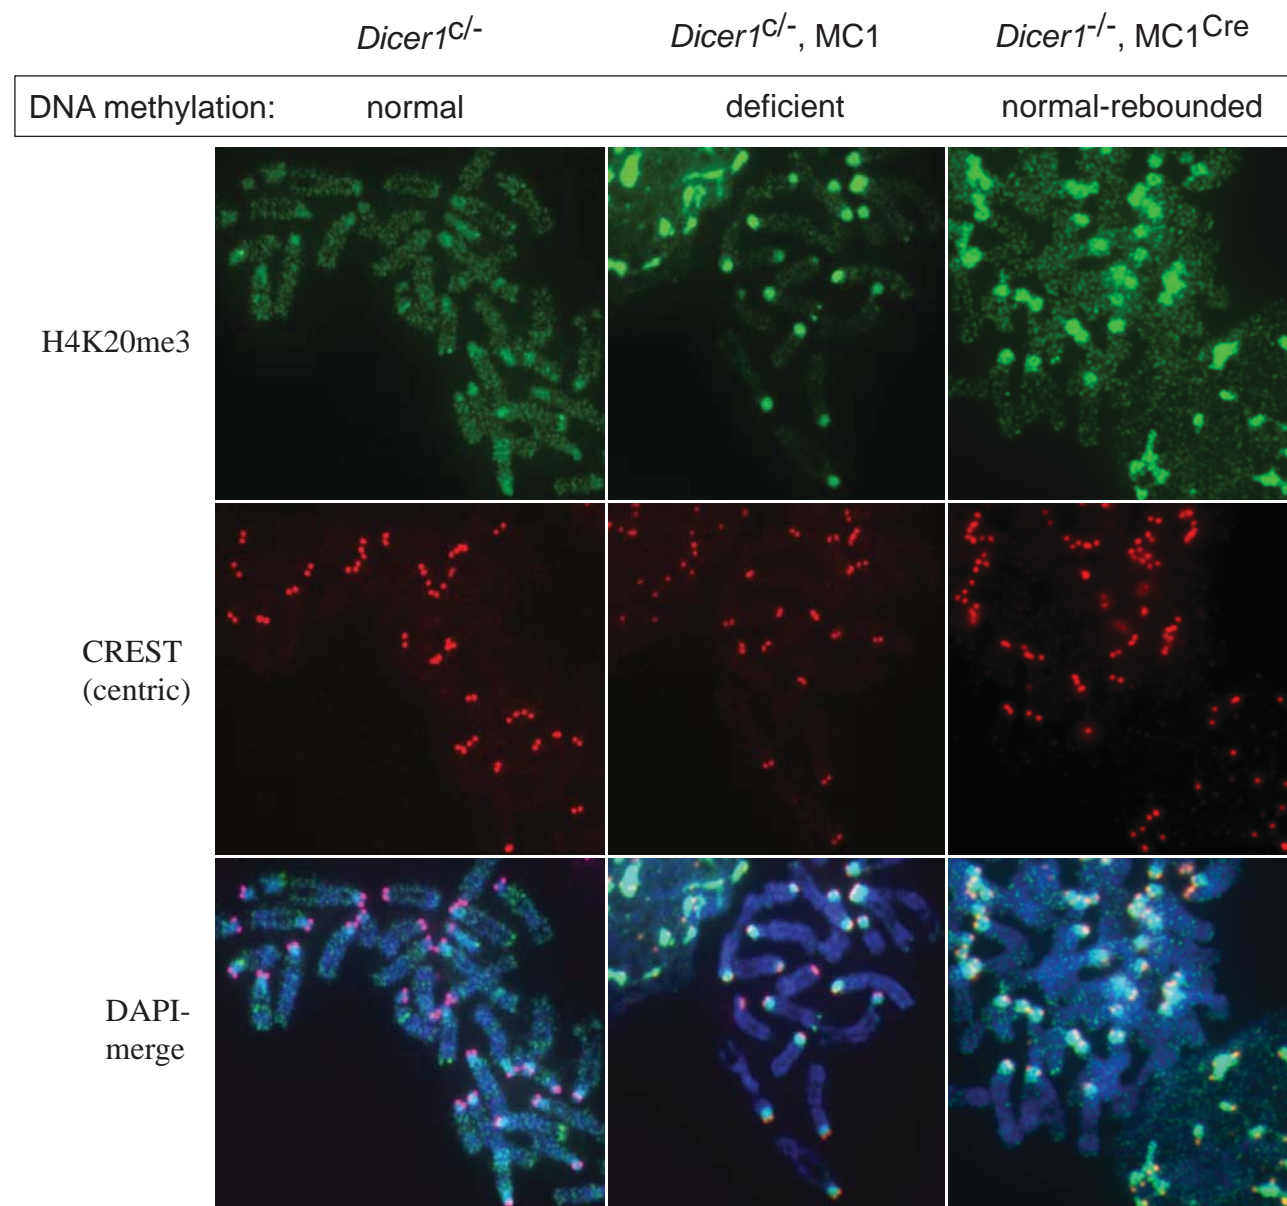

Supplement: pgen.1002919.s002.pdf [file pgen.1002919.s002.pdf]
