# Supplementary material for: Normal DNA Methylation Dynamics in DICER1-Deficient Mouse Embryonic Stem Cells
Source: PubMed Central journal article supplement (PMC3435250; doi:10.1371/journal.pgen.1002919), 2012-09-06
Supplement: pgen.1002919.s004.pdf [file pgen.1002919.s004.pdf]

## Text S1. Primers and sequences

### *qPCR primers*

mRNA: *Rps7*

upper primer: 5'-CCGGCTAGTTCGTGAATTGG-3'

lower primer: 5'-GAATCCTCCTCTGAGCAATGAAG-3'

TaqMan probe: 5'-/TEX615/AAAAGTTCAGTGGCAAGCACGTGG/3IABkFQ/-3'

mRNA: *Alp1*

upper primer: 5'-CCTGCCTTACCAACTCTTTTGTG-3'

lower primer: 5'-CAGGGCATTTCCTCAAGGTCTCT-3',

TaqMan probe: 5'-/Cy5/AGAGAAAGAGAGAGACCCAGTTACTGGCGA/3IABkFQ/-3'

mRNA: *Dnmt1*

upper primer: 5'-TGGGTGACAGTGTGTACCTTCCT-3'

lower primer: 5'-ATCCTTCTTTGGGCGTTTCA-3'

TaqMan probe: 5'-/HEX/CCGAGGCCTTTACTTTCAACATCA/3IABkFQ/-3'

mRNA: *Dnmt3a*

upper primer: 5'-CCAGCCCTCGGGTCCTAA-3'

lower primer: 5'-ACCCACATGTCTGGGTGTAACCTTC-3'

TaqMan probe: 5'-/6-FAM/AGCCACCAG/ZEN/AAGAAGAGAAGAATCCTTACA/3IABkFQ/-3'

mRNA: *Dnmt3b*

upper primer: 5'-TGGAGTTCAGTAGGACAGCAAAGT-3'

lower primer: 5'-GTTTTTGCCCTGTCTGATGGA-3'

TaqMan probe: 5'-/HEX/AAAGAAAGTGCAGACAATAACCACCAAGTCGA/3IABkFQ/-3'

mRNA: *Dnmt3l*

upper primer: 5'-GAGTTACTGCACCATCTGCTGTTTC-3'

lower primer: 5'-ACTCGAAACAGTAGCATCTGGTACA-3'

TaqMan probe: 5'-/6-FAM/TACCCTGTT/ZEN/CATCTGTGAGAGCCCCG/3IABkFQ/-3'

mRNA: *Rbl2*

upper primer: 5'-TGAGAGCAGAAGCCATCAGAATT-3'

lower primer: 5'-CCTCATCACTGGGCTGGAAT-3'

TaqMan probe: 5'-/6-FAM/TCCAACCGA/ZEN/ACTAAATACAGACAGAGCCAGTAGA/  
3IABkFQ/-3'

### *Bisulphite sequencing primers*

Chr 1 subtelomeric region, bases 197167907-197168572 NCBIM37  
upper primer: 5'-AAGATGGTGAGTGTAGGTGTTAGTTGAG-3'  
lower primer: 5'-TCTTTCTTCTAACTTCTATAACTTCCTATTACCTT-3'  
amplicon size: 666 bp  
CpGs analysed: 17

Chr 19 subtelomeric region, bases 61333524-61333949 NCBIM37  
upper primer: 5'-AGGATTTGTTGATAAGTTTTGGGTTTTTGG-3'  
lower primer: 5'-CTAATTCAAAAATAAAAATTTCTCCCTAC-3'  
amplicon size: 426 bp  
CpGs analysed: 18

### *EpiTYPER primers*

Locus\_assay no.: *Xist\_1*, Epipanel

upper primer:

5'-AGGAAGAGAGGTAGAGGATTAGGGGATAGGGTTTA-3'

lower primer:

5'-CAGTAATACGACTCACTATAGGGAGAAGGCTCACATTCAAAAACATATACCACCTCT-3'

amplicon size: 319 bp

CpG units analysed: 2, nos. 1/5.6; CpGs not analysed: CG

gene region analysed: exon 1, CpG-rich region 2

sequence:GCAGAGGACTAGGGGATAGGGCTCAGCGTGGGTGTGGGGATTGGGCAGGGTGTGTGTCATA  
TGGACCCCTGGCGCGTCCCCCGTGGCTTTAAGGGCTGCTCAGAAGTCTATAAAATGGCGGCTCGGGGCT  
CCACCAGAGGCTCGACAGCCCAATCTTTGTTCTGGTGTGTAGCAATGGATTATAGGACATTTAGGTCTAC  
AGGAAAAGATGGCGGCTCAAGTTCCTGGTGCGGTATAACCGCAAAGGGCTTTGTGTGTCACATGTCAGCTTC  
ATGTCTGAGTTAGCCTGGAGAGGTGGCACATGCTCTTGAATGTG

Locus\_assay no.: *Xist\_2*, Epipanel

upper primer:

5'-AGGAAGAGAGTGTGTGTGAGTGAATTTATGGTTT-3'

lower primer:

5'-CAGTAATACGACTCACTATAGGGAGAAGGCTCTAAACCCTATCCCCTAATCCTCTA-3'

amplicon size: 351 bp

CpG units analysed: 9, nos. 2/3.4.5/6/8/12.13/14.15/16/17/20.21.22

gene region analysed: exon 1, CpG-rich region 2

sequence:TGCTGTGTGAGTGAACCTATGGCTTAGAAAAACGACTTTGCTCTTAAACTGAGTGGGTGTTT  
AGGGCGTGGAGAGCCCGCGTCCGTCGTCATTATGGCTTCTGCGTGATACTGCTATTCTCGAGCCAGTTACCCA  
AGAATTAGGACACCGAGGAGCACAGCGGACTGGATAAAAGCAACCAATTGCGCTGCGTAGCTAAAGGCTT  
TCTTTATATGTGCGGGTTGCGGGATTCCCTTGATTTGTGGTAGCATTGCGGGGTTGTGCTAGCCGAA  
GTAGAAAGCCAAGGAGTGCTCGTATTAGTGTGCGGTGTTGCGCGGAAGCCGACAGAGGACTAGGGGATAGGG  
CTCAG

Locus\_assay no.: *Xist\_4*, EpiDesigner (antisense)

upper primer:

5'-AGGAAGAGAGTTATAAGGTTTGGTGGTAGGGGAAT-3'

lower primer:

5'-CAGTAATACGACTCACTATAGGGAGAAGGCTTCAAATACAAATCTTTATAACCACTCC-3'

amplicon size: 196 bp

CpGs analysed: 3, nos. 5/7.8.9/10; CpGs not analysed: CG

gene region analysed: promoter; CpG-rich region 1; exon 1

sequence: CCATAAGGCTTGGTGGTAGGGGAACTAAAAATGTTCCCCCAAAGCTCCTTAGATGGAGAGAA  
ACCA CGGAAGAAC CGCACATCCA CGGGAAA CGAGCAAACATGGCTGGAGCAAGC CGTTGCA CGCCTTTAAC  
TGATC CGCG CGCTGAAGG CGGAGAGACCAGAAGAGGAGTGGCCACAAAGATTGCAATTCTGA

Locus\_assay no.: *Gja8\_1* (EpiDesigner)

upper primer:

5'-AGGAAGAGAGGAGGGGTTTTTAGTTTTTAATTTTAGG-3'

lower primer:

5'-CAGTAATACGACTCACTATAGGGAGAAGGCTAAACACCCATTATAAAACAACCCTTT-3'

amplicon size: 371 bp

CpGs analysed: 2, no. 2/3

gene region analysed: <1 kb upstream of AUG translation start site

sequence: GAGGGGTTTTCCAGCTCTCAACCCAGGAAAAGAAAGCATAAATTAGGACTGCAGAAGTCAGA  
GAAA CGTGTAGCCACATCACAGGCAGTATTTCTTAATGGTTTGAGAATCCAACCTATGGGAT CGGGTACA  
GAACTGCTAGCTAGCATTTAGCTACCTGATCTTAGACCATCTGTTTAGCCTCAAAGCCCCTGTTTTCTCA  
CACATTGAAAGCAAGCTGGAAACAACAACACATCTGTGTGTG CGGGAATTGGCTATGCAGCTGTAAC  
CAATAGGCAGGTCCTACCATCAGATAGCTAAGGTCTAACAGGACTAAGATAAA CGAAATGATGCAACATC  
AAAGGGCTGTCCATAATGGGTGTCC

Locus\_assay no.: *Trpc1\_1*, EpiDesigner

upper primer:

5'-AGGAAGAGAGTTGGTTTTATTTTGGAGTTTTTTGGA-3'

lower primer:

5'-CAGTAATACGACTCACTATAGGGAGAAGGCTACCTCTCCTATTCAAACACTTTTATCCC-3'

amplicon size: 273 bp

CpGs analysed: 1, no. 3; CpGs not analysed: CG

gene region analysed: <1.5 kb upstream of AUG translation start site

CTGGCTTACCTTGAGCCTCTTGAAATTTACCAAACCTCATAAACTTGGAAGTGTATTAACATTACA CG  
ACAA CGGGGAGATCATTTAGAAACAAAACCTGGAGCAACTTGAGATTATCATTTACATCAAATACAGAAAA  
CGTTTGAAAAGATGACTT CGACATCAAAGACTTTTAGAGAATATCTAAAGAGAACATTGATTTTTAAGAAT  
TAGTAAGTTAAATGTTGAAAGAGAACTAATGGGACAAAGTAGCCTGAATAGGAGAGGC

Locus\_assay no.: *H19\_1*, EpiPanel (antisense)

upper primer:

5'-AGGAAGAGAGTTTGGTTTGGAGTTAGTTTTTTAGTTTTTTTAA-3'

lower primer:

5'-CAGTAATACGACTCACTATAGGGAGAAGGCTACCACTCCAATTAACAAAAACCC-3'

amplicon size: 198 bp

CpGs analysed: 4, no. 2/4/5.6/7; CpGs not analysed: CG

gene region analysed: promoter

sequence: TCTGCCTGAGCTAGCCCTCAGTCCTTCAACATTCCTGCCAGACTCCAGATGC CGAGGTGCT  
CCT CGGACCCCA CGACTCTCCTCCAGCTCTCCATCTTCCCAGTTTTCCC CGATACCCCCACCCACCC  
CCCACCCCTCCACACC CGGTGCTT CGGGCCCTCTAGCC CGGCTTTTTCTAACTGGAGTGGC

Locus\_assay no.: H19\_4, EpiDesigner

upper:

5'-AGGAAGAGAGTGTAAAGGAGATTATGTTTTATTTTTTGA-3'

lower:

5'-CAGTAATACGACTCACTATAGGGAGAAGGCTCCCCCTAATAACATTTATAACCCC-3'

amplicon size: 203 bp

CpGs analysed: 3, no. 1/2.3/4.5; CpGs not analysed: CG

gene region analysed: imprinting control region; CTCF binding site

sequence: TGCAAGGAGACCATGCCCTATTCTTGGACGCTCTGCTGAATCAGTTGTGGGGTTTATACGCGG  
GAGTTGCCGCGTGGTGGCAGCAAAATCGATTGCGCCAAACCTAAAGAGCCCCCCCACCCCTGGTATTGGAA  
TTCACAAATGGCAATGCTGTGGGTCACCCAAGTTCAGTACCTCAGGGGGTACACAAATGCCACTAGGGGG

Locus\_assay no.: H19\_5, EpiDesigner (antisense)

upper primer:

5'-AGGAAGAGAGTTTATGATTATGGGATTATAGATGGTGA-3'

lower primer:

5'-CAGTAATACGACTCACTATAGGGAGAAGGCTACCTCAAAAAAATCACAATACCAC-3'

amplicon size: 242 bp

CpGs analysed: 1, no. 4.5.6; CpGs not analysed: CG

gene region analysed: imprinting control region; CTCF binding site

sequence: CCCATGACTATGGGATCATAGATGGTGATAGGGGAGAAAACCTCAATCAGTTGCAATCCGTTT  
TAGGACTGCCGATGTACCGAGACTTCACTGCGCGTGGCAACCCTGGTCTTTACACACAAAGGATTCTTT  
GCAGAGAGTAAGCCGACCTTGTGATTTGGGAGTCCGAGTCCAGGAGGTACCAGCCTAGAAAATGCATGTG  
TCCTGCCCCCTAGTGGCATTGTGACCCCCCTGAGGT

## Primers used to clone the stem-loop into inverted BsmBI sites

5'-TTTGAGTGTGTGAGGGAGAAATTCA AGAGATTTCTCCCTCACACACTCTTTT...-3'  
3'-...TCACACACTCCCTCTTTAAGTCTCT AAAGAGGGAGTGTGTGAGAAAAAAGAG-5'

## Sequence of the mU6pr cassette with inverted BsmBI sites for stem-loop cloning

CTCGAGATCCGACGCCGCCATCTCTAGGCCCGCGCCGGCCCCCTCGCACAGACTTGTGGGAGAAGCTCGGC  
TACTCCCCTGCCCCGGTTAATTTGCATATAAATTTCTAGTAACTATAGAGGCTTAATGTGCGATAAAAG  
ACAGATAATCTGTTCTTTTAAATACTAGCTACATTTTACATGATAGGCTTGGATTTCTATAAGAGATACAA  
ATACTAAATTATTATTTTAAAAACAGCACAAAAGGAAACTCACCCCTAACTGTAAAGTAATTGTGTGTTTT  
GAGACTATAAATATCCCTTGGAGAAAAGCCTTGTGTGAGACGACTGCAGTCTCTCTCTCGACGGCGC  
GCC.Pgk1>sneo>poly(A).GGCGCGCCGTCGAC
