# Supplementary material for: Normal DNA Methylation Dynamics in DICER1-Deficient Mouse Embryonic Stem Cells
Source: PLoS Genet. 2012 Sep 6;8(9):e1002919. doi: 10.1371/journal.pgen.1002919 (PMC3435250; doi:10.1371/journal.pgen.1002919)
Supplement: Table S1 — Characteristics of Dicer1 −/− ES cell lines. Characteristics surveyed are indicated at left. Green, yellow and blue cell background indicates normal, low and high levels or content, respectively. The letters inside the cells indicate the assay method used: BS, bisulphite sequencing assay; ChIP DB, chromatin immunoprecipitation followed by dot blot; COBRA, comined bisulphite restriction analysis; ET, EpiTYPER assay; IB, immunoblotting; IF, immunofluorescence; MA, microarray; NB, northern blot; nd, not done; PCR, polymerase chain reaction; RTPCR, reverse transcription PCR; SB, Southern blot; qPCR, quantitative PCR. (XLSX) [file pgen.1002919.s003.xlsx]

## Sheet: Sheet1
Table 1. Characteristics of Dicer1-/- ES cell lines
		normal		high		low
	Dicer1 -/- ES cells
		Reference							This study
Characteristic	Region	[9]	[13]	[14]	[12]	[15]	[16]		Early	Later	Rebound
DNA methylation level	MajS	nd	nd	SB	nd	nd	nd		SB	SB	SB
	MinS	SB	SB	SB	nd	BS	nd		SB	SB	SB
	L1	nd	SB	nd	nd	BS	nd		SB	SB	SB
	ERV2	nd	nd	nd	nd	BS	nd		SB	SB	SB
	ERV3	nd	nd	nd	nd	BS	nd		nd	nd	nd
	SINE	nd	nd	nd	COBRA	nd	nd		nd	nd	nd
	Global	nd	nd	nd	ChIP,DB	nd	nd		nd	nd	nd
	SubTel	nd	nd	nd	BS	nd	nd		BS	nd	BS
	Xist	nd	nd	nd	nd	nd	S,ET		ET	nd	ET
	Ctcf	nd	nd	nd	nd	BS	nd		nd	nd	nd
	Gja8	nd	nd	nd	nd	nd	nd		ET	nd	ET
	Trpc1	nd	nd	nd	nd	nd	nd		ET	nd	ET
	H19	nd	nd	nd	nd	nd	nd		ET	nd	ET
RNA content	MajS	qPCR	nd	RTPCR	nd	nd	nd		nd	nd	nd
	MinS	RTPCR,NB	nd	nd	nd	nd	nd		nd	nd	nd
	Dnmt1	nd	nd	nd	qPCR	MA	qPCR		qPCR	nd	qPCR
	Dnmt3a	nd	nd	nd	qPCR	MA	qPCR		qPCR	nd	qPCR
	Dnmt3b	nd	nd	nd	qPCR	MA	qPCR		qPCR	nd	qPCR
	Dnmt3l	nd	nd	nd	nd	MA	qPCR		qPCR	nd	qPCR
	Rbl2	nd	nd	nd	qPCR	MA	nd		qPCR	nd	qPCR
Protein content	DNMT1	nd	nd	nd	IB	IB	IB		IB	IB	IB
	DNMT3A2	nd	nd	nd	IB	IB	IB		IB	IB	IB
	DNMT3B	nd	nd	nd	IB	IB	IB		IB	IB	IB
	DNMT3L	nd	nd	nd	nd	nd	nd		IB	IB	IB
	RBL2	nd	nd	nd	nd	nd	nd		IB	IB	IB
MajS histone PTMs content	H3K9me	IF	nd	PCR	ChIP,DB	nd	nd		IF	nd	IF
	H4K20me	nd	nd	nd	ChIP,DB	nd	nd		IF	nd	IF
	H3K9ac	nd	nd	nd	ChIP,DB	nd	nd		nd	nd	nd
	CBX	IF	nd	nd	ChIP,DB	nd	nd		IF	nd	IF
Telomere histone PTMs content	H3K9me3	nd	nd	nd	ChIP,DB	nd	nd		nd	nd	nd
	H4K20me3	nd	nd	nd	ChIP,DB	nd	nd		nd	nd	nd
	H3K9ac	nd	nd	nd	ChIP,DB	nd	nd		nd	nd	nd
	CBX	nd	nd	nd	ChIP,DB	nd	nd		nd	nd	nd
